# Supplementary material for: Combined Analysis of ceRNA Regulatory Network and DNA Methylation in CAD
Source: Research Square preprint supplement (doi:10.21203/rs.3.rs-917459/v1), 2021-09-30
Supplement: Supplementary file 1 [file 050971f5486b0e6f1d56eac2.xlsx]

## Sheet: Sheet1
ID	Description	GeneRatio	BgRatio	pvalue	geneID	Count
GO:0000287	magnesium ion binding	5/131	217/18352	0.0198011	DYRK2/PIF1/TPPP/WEE1/NIM1K	5
GO:0000460	maturation of 5.8S rRNA	2/126	36/18866	0.024043	ABT1/EXOSC10	2
GO:0000466	maturation of 5.8S rRNA from tricistronic rRNA transcript (SSU-rRNA, 5.8S rRNA, LSU-rRNA)	2/126	25/18866	0.0120073	ABT1/EXOSC10	2
GO:0000469	cleavage involved in rRNA processing	2/126	28/18866	0.0149336	ABT1/EXOSC10	2
GO:0000794	condensed nuclear chromosome	3/133	103/19559	0.0332336	ADD3/HORMAD2/SS18L1	3
GO:0000922	spindle pole	4/133	165/19559	0.0263028	BOD1/FAM83D/OR2A4/PLK2	4
GO:0001558	regulation of cell growth	7/126	420/18866	0.0227387	IFRD1/IGFBP3/NANOS1/PARP2/CXCL12/PLXNA4/PTPRS	7
GO:0001654	eye development	8/126	384/18866	0.00428335	AHI1/FOXC1/GRHL2/HIF1A/JUN/RARB/RORB/PROM1	8
GO:0001657	ureteric bud development	3/126	98/18866	0.0279528	FOXC1/RARB/NOG	3
GO:0001701	in utero embryonic development	8/126	383/18866	0.00421723	FOXC1/GRHL2/HIF1A/MIB1/TMED2/UNK/ADM/NOG	8
GO:0001754	eye photoreceptor cell differentiation	2/126	46/18866	0.0378354	RORB/PROM1	2
GO:0001756	somitogenesis	3/126	70/18866	0.011502	FOXC1/MIB1/TMED2	3
GO:0001774	microglial cell activation	2/126	50/18866	0.0440196	JUN/SYT11	2
GO:0001778	plasma membrane repair	2/126	12/18866	0.00279549	SYT11/TRIM72	2
GO:0001822	kidney development	5/126	283/18866	0.0414392	AHI1/FOXC1/RARB/NOG/PROM1	5
GO:0001823	mesonephros development	3/126	103/18866	0.0317385	FOXC1/RARB/NOG	3
GO:0001837	epithelial to mesenchymal transition	4/126	152/18866	0.0190132	FAM83D/FOXC1/HIF1A/NOG	4
GO:0001838	embryonic epithelial tube formation	6/126	125/18866	0.000193132	GRHL2/HIF1A/MIB1/TMED2/ADM/NOG	6
GO:0001841	neural tube formation	6/126	106/18866	7.78627e-05	GRHL2/HIF1A/MIB1/TMED2/ADM/NOG	6
GO:0001843	neural tube closure	4/126	91/18866	0.00323954	GRHL2/TMED2/ADM/NOG	4
GO:0001890	placenta development	4/126	156/18866	0.0206955	GRHL2/HIF1A/TMED2/ADM	4
GO:0001892	embryonic placenta development	4/126	89/18866	0.00298987	GRHL2/HIF1A/TMED2/ADM	4
GO:0001938	positive regulation of endothelial cell proliferation	3/126	113/18866	0.040072	HIF1A/JUN/CXCL12	3
GO:0001947	heart looping	4/126	64/18866	0.000884272	AHI1/HIF1A/MIB1/TMED2	4
GO:0001961	positive regulation of cytokine-mediated signaling pathway	2/126	50/18866	0.0440196	HIF1A/TXK	2
GO:0002269	leukocyte activation involved in inflammatory response	2/126	50/18866	0.0440196	JUN/SYT11	2
GO:0002687	positive regulation of leukocyte migration	4/126	142/18866	0.0151885	ADAM8/CAMK1D/CXCL12/CXCL8	4
GO:0002690	positive regulation of leukocyte chemotaxis	3/126	96/18866	0.0265104	CAMK1D/CXCL12/CXCL8	3
GO:0002691	regulation of cellular extravasation	2/126	33/18866	0.0204131	ADAM8/CXCL12	2
GO:0003002	regionalization	6/126	355/18866	0.032	AHI1/CELSR2/FOXC1/MIB1/TMED2/NOG	6
GO:0003007	heart morphogenesis	9/126	258/18866	5.95777e-05	AHI1/FOXC1/GRHL2/HIF1A/JUN/MIB1/RARB/TMED2/NOG	9
GO:0003143	embryonic heart tube morphogenesis	4/126	70/18866	0.0012374	AHI1/HIF1A/MIB1/TMED2	4
GO:0003151	outflow tract morphogenesis	5/126	80/18866	0.000197635	FOXC1/HIF1A/JUN/RARB/NOG	5
GO:0003205	cardiac chamber development	5/126	174/18866	0.00627647	FOXC1/GRHL2/HIF1A/RARB/NOG	5
GO:0003206	cardiac chamber morphogenesis	5/126	131/18866	0.00186744	FOXC1/GRHL2/HIF1A/RARB/NOG	5
GO:0003208	cardiac ventricle morphogenesis	4/126	73/18866	0.00144649	FOXC1/GRHL2/HIF1A/NOG	4
GO:0003231	cardiac ventricle development	4/126	131/18866	0.0115886	FOXC1/GRHL2/HIF1A/NOG	4
GO:0003407	neural retina development	3/126	72/18866	0.0124118	AHI1/RORB/PROM1	3
GO:0003416	endochondral bone growth	2/126	27/18866	0.0139271	BNC2/RARB	2
GO:0003713	transcription coactivator activity	5/131	267/18352	0.0427027	ABT1/FOXC1/JMY/RFXAP/SS18L1	5
GO:0004659	prenyltransferase activity	2/131	17/18352	0.006411	FNTA/GGPS1	2
GO:0004713	protein tyrosine kinase activity	4/131	135/18352	0.0160068	CRIM1/DYRK2/TXK/WEE1	4
GO:0004715	non-membrane spanning protein tyrosine kinase activity	2/131	46/18352	0.0426699	TXK/WEE1	2
GO:0005178	integrin binding	4/131	144/18352	0.0197951	FRMD5/CXCL12/FERMT2/TSPAN8	4
GO:0005520	insulin-like growth factor binding	2/131	29/18352	0.0181013	CRIM1/IGFBP3	2
GO:0005793	endoplasmic reticulum-Golgi intermediate compartment	4/133	130/19559	0.0120126	ERGIC2/TMED2/PROM1/TGFA	4
GO:0005819	spindle	6/133	367/19559	0.0395959	BOD1/FAM83D/OR2A4/PLK2/TPPP/ESPL1	6
GO:0006164	purine nucleotide biosynthetic process	5/126	197/18866	0.0104219	ATIC/HACD2/PAPSS2/PPT2/PDP2	5
GO:0006278	RNA-dependent DNA biosynthetic process	3/126	76/18866	0.0143521	EXOSC10/PIF1/TENT4B	3
GO:0006304	DNA modification	3/126	120/18866	0.0464997	GRHL2/PARP2/TET3	3
GO:0006353	DNA-templated transcription, termination	3/126	75/18866	0.0138519	CSTF2T/MNAT1/MED18	3
GO:0006369	termination of RNA polymerase II transcription	2/126	35/18866	0.0228055	CSTF2T/MED18	2
GO:0006470	protein dephosphorylation	7/126	323/18866	0.00602193	BOD1/HACD2/IGFBP3/NUAK1/PPP1R15A/PDP2/PTPRS	7
GO:0006637	acyl-CoA metabolic process	3/126	104/18866	0.0325263	HACD2/PPT2/PDP2	3
GO:0006790	sulfur compound metabolic process	6/126	371/18866	0.0383826	CHST2/GSTO2/HACD2/PAPSS2/PPT2/PDP2	6
GO:0006888	endoplasmic reticulum to Golgi vesicle-mediated transport	4/126	206/18866	0.0494621	DYNC1H1/ERGIC2/TMED2/TGFA	4
GO:0006890	retrograde vesicle-mediated transport, Golgi to endoplasmic reticulum	4/126	87/18866	0.00275369	DNAJC28/ERGIC2/GOLPH3/TMED2	4
GO:0006900	vesicle budding from membrane	3/126	110/18866	0.0374662	GOLPH3/TMED2/TGFA	3
GO:0006903	vesicle targeting	3/126	95/18866	0.0258046	TBC1D23/TMED2/TGFA	3
GO:0006984	ER-nucleus signaling pathway	2/126	51/18866	0.0456206	PPP1R15A/CXCL8	2
GO:0007004	telomere maintenance via telomerase	3/126	69/18866	0.0110621	EXOSC10/PIF1/TENT4B	3
GO:0007051	spindle organization	4/126	183/18866	0.0344218	DYNC1H1/PLK2/TPPP/ESPL1	4
GO:0007062	sister chromatid cohesion	3/126	63/18866	0.00862985	BOD1/ESPL1/HORMAD2	3
GO:0007368	determination of left/right symmetry	4/126	125/18866	0.00988128	AHI1/HIF1A/MIB1/TMED2	4
GO:0007389	pattern specification process	7/126	455/18866	0.0331182	AHI1/CELSR2/FOXC1/HIF1A/MIB1/TMED2/NOG	7
GO:0007549	dosage compensation	2/126	19/18866	0.00702503	EXOSC10/YTHDC1	2
GO:0008009	chemokine activity	2/131	49/18352	0.0478215	CXCL12/CXCL8	2
GO:0008045	motor neuron axon guidance	2/126	31/18866	0.0181336	NOG/PLXNA4	2
GO:0008064	regulation of actin polymerization or depolymerization	4/126	190/18866	0.0386704	ADD3/JMY/CXCL12/KIRREL1	4
GO:0008334	histone mRNA metabolic process	2/126	25/18866	0.0120073	EXOSC10/TENT4B	2
GO:0008361	regulation of cell size	4/126	181/18866	0.0332606	IFRD1/CXCL12/PLXNA4/PTPRS	4
GO:0009048	dosage compensation by inactivation of X chromosome	2/126	17/18866	0.00563606	EXOSC10/YTHDC1	2
GO:0009152	purine ribonucleotide biosynthetic process	5/126	173/18866	0.00612819	ATIC/HACD2/PAPSS2/PPT2/PDP2	5
GO:0009165	nucleotide biosynthetic process	5/126	266/18866	0.0331137	ATIC/HACD2/PAPSS2/PPT2/PDP2	5
GO:0009260	ribonucleotide biosynthetic process	5/126	186/18866	0.00825759	ATIC/HACD2/PAPSS2/PPT2/PDP2	5
GO:0009799	specification of symmetry	4/126	135/18866	0.012826	AHI1/HIF1A/MIB1/TMED2	4
GO:0009855	determination of bilateral symmetry	4/126	134/18866	0.0125091	AHI1/HIF1A/MIB1/TMED2	4
GO:0009952	anterior/posterior pattern specification	5/126	219/18866	0.0158567	CELSR2/FOXC1/MIB1/TMED2/NOG	5
GO:0010833	telomere maintenance via telomere lengthening	3/126	81/18866	0.0170062	EXOSC10/PIF1/TENT4B	3
GO:0010842	retina layer formation	2/126	25/18866	0.0120073	AHI1/PROM1	2
GO:0010921	regulation of phosphatase activity	4/126	175/18866	0.0299171	BOD1/IGFBP3/NUAK1/PPP1R15A	4
GO:0014020	primary neural tube formation	5/126	98/18866	0.000507426	GRHL2/HIF1A/TMED2/ADM/NOG	5
GO:0014046	dopamine secretion	2/126	35/18866	0.0228055	CXCL12/SYT11	2
GO:0014059	regulation of dopamine secretion	2/126	35/18866	0.0228055	CXCL12/SYT11	2
GO:0015872	dopamine transport	2/126	49/18866	0.0424402	CXCL12/SYT11	2
GO:0016049	cell growth	8/126	490/18866	0.0171191	IFRD1/IGFBP3/NANOS1/PARP2/CXCL12/PLXNA4/PTPRS/RAPH1	8
GO:0016074	snoRNA metabolic process	2/126	17/18866	0.00563606	EXOSC10/TENT4B	2
GO:0016311	dephosphorylation	7/126	492/18866	0.0471193	BOD1/HACD2/IGFBP3/NUAK1/PPP1R15A/PDP2/PTPRS	7
GO:0016331	morphogenesis of embryonic epithelium	6/126	151/18866	0.000532548	GRHL2/HIF1A/MIB1/TMED2/ADM/NOG	6
GO:0016358	dendrite development	5/126	247/18866	0.0251501	CAMK1D/CELSR2/PLK2/PTPRS/SS18L1	5
GO:0016765	transferase activity, transferring alkyl or aryl (other than methyl) groups	3/131	56/18352	0.00747944	FNTA/GGPS1/GSTO2	3
GO:0019208	phosphatase regulator activity	3/131	99/18352	0.0339595	BOD1/IGFBP3/PPP1R15A	3
GO:0019211	phosphatase activator activity	2/131	16/18352	0.0056832	IGFBP3/PPP1R15A	2
GO:0019888	protein phosphatase regulator activity	3/131	85/18352	0.0229652	BOD1/IGFBP3/PPP1R15A	3
GO:0021510	spinal cord development	3/126	109/18866	0.0366176	ABT1/NOG/PTPRS	3
GO:0021537	telencephalon development	6/126	259/18866	0.00791389	ATIC/HIF1A/RARB/CXCL12/PLXNA4/PTPRS	6
GO:0021549	cerebellum development	4/126	105/18866	0.00539505	ATIC/FOXC1/NANOS1/PTPRS	4
GO:0021591	ventricular system development	2/126	32/18866	0.019259	CELSR2/MNAT1	2
GO:0021915	neural tube development	6/126	163/18866	0.000795636	GRHL2/HIF1A/MIB1/TMED2/ADM/NOG	6
GO:0021987	cerebral cortex development	3/126	118/18866	0.044614	ATIC/HIF1A/PTPRS	3
GO:0022037	metencephalon development	4/126	114/18866	0.00719421	ATIC/FOXC1/NANOS1/PTPRS	4
GO:0030134	COPII-coated ER to Golgi transport vesicle	3/133	95/19559	0.0270393	ERGIC2/TMED2/TGFA	3
GO:0030279	negative regulation of ossification	3/126	84/18866	0.0187216	HIF1A/RORB/NOG	3
GO:0030516	regulation of axon extension	4/126	97/18866	0.00407313	IFRD1/CXCL12/PLXNA4/PTPRS	4
GO:0030517	negative regulation of axon extension	2/126	43/18866	0.0334381	IFRD1/PTPRS	2
GO:0030593	neutrophil chemotaxis	3/126	103/18866	0.0317385	CAMK1D/CXCL8/CXCR1	3
GO:0030595	leukocyte chemotaxis	5/126	232/18866	0.0198232	ADAM8/CAMK1D/CXCL12/CXCL8/CXCR1	5
GO:0030832	regulation of actin filament length	4/126	191/18866	0.0393008	ADD3/JMY/CXCL12/KIRREL1	4
GO:0030856	regulation of epithelial cell differentiation	4/126	171/18866	0.0278042	AHI1/FOXC1/GRHL2/PROM1	4
GO:0030858	positive regulation of epithelial cell differentiation	3/126	75/18866	0.0138519	AHI1/FOXC1/PROM1	3
GO:0030900	forebrain development	7/126	391/18866	0.0160529	ATIC/HIF1A/RARB/CXCL12/NOG/PLXNA4/PTPRS	7
GO:0030902	hindbrain development	6/126	156/18866	0.000632301	AHI1/ATIC/FOXC1/NANOS1/NOG/PTPRS	6
GO:0031099	regeneration	7/126	201/18866	0.000406839	ATIC/IFRD1/JUN/TXK/ADM/CXCL12/PTPRS	7
GO:0031100	animal organ regeneration	3/126	75/18866	0.0138519	ATIC/ADM/CXCL12	3
GO:0031102	neuron projection regeneration	3/126	59/18866	0.00720222	JUN/ADM/PTPRS	3
GO:0031103	axon regeneration	2/126	52/18866	0.0472428	JUN/PTPRS	2
GO:0031126	snoRNA 3'-end processing	2/126	13/18866	0.00328936	EXOSC10/TENT4B	2
GO:0031623	receptor internalization	4/126	115/18866	0.00741569	AHI1/ADM/CXCL8/CXCR1	4
GO:0031624	ubiquitin conjugating enzyme binding	2/131	33/18352	0.0231093	DCUN1D1/TRIM72	2
GO:0031641	regulation of myelination	2/126	46/18866	0.0378354	RARB/TPPP	2
GO:0032006	regulation of TOR signaling	3/126	102/18866	0.0309609	FAM83D/GOLPH3/HIF1A	3
GO:0032204	regulation of telomere maintenance	3/126	80/18866	0.016455	EXOSC10/PIF1/TENT4B	3
GO:0032205	negative regulation of telomere maintenance	3/126	36/18866	0.00176805	EXOSC10/PIF1/TENT4B	3
GO:0032210	regulation of telomere maintenance via telomerase	3/126	53/18866	0.0053424	EXOSC10/PIF1/TENT4B	3
GO:0032211	negative regulation of telomere maintenance via telomerase	3/126	20/18866	0.000305158	EXOSC10/PIF1/TENT4B	3
GO:0032350	regulation of hormone metabolic process	2/126	32/18866	0.019259	HIF1A/ADM	2
GO:0032352	positive regulation of hormone metabolic process	2/126	13/18866	0.00328936	HIF1A/ADM	2
GO:0032535	regulation of cellular component size	8/126	383/18866	0.00421723	ADD3/IFRD1/JMY/PPP1R15A/CXCL12/KIRREL1/PLXNA4/PTPRS	8
GO:0032608	interferon-beta production	2/126	50/18866	0.0440196	POLR3F/PTPRS	2
GO:0032648	regulation of interferon-beta production	2/126	48/18866	0.0408828	POLR3F/PTPRS	2
GO:0032835	glomerulus development	3/126	64/18866	0.00901078	FOXC1/NOG/PROM1	3
GO:0033002	muscle cell proliferation	5/126	244/18866	0.0240185	FOXC1/IGFBP3/JUN/MNAT1/NOG	5
GO:0033116	endoplasmic reticulum-Golgi intermediate compartment membrane	3/133	75/19559	0.0145408	ERGIC2/TMED2/TGFA	3
GO:0033622	integrin activation	2/126	24/18866	0.0110948	CXCL12/FERMT2	2
GO:0033865	nucleoside bisphosphate metabolic process	4/126	138/18866	0.0138074	HACD2/PAPSS2/PPT2/PDP2	4
GO:0033866	nucleoside bisphosphate biosynthetic process	4/126	67/18866	0.00105044	HACD2/PAPSS2/PPT2/PDP2	4
GO:0033875	ribonucleoside bisphosphate metabolic process	4/126	138/18866	0.0138074	HACD2/PAPSS2/PPT2/PDP2	4
GO:0034030	ribonucleoside bisphosphate biosynthetic process	4/126	67/18866	0.00105044	HACD2/PAPSS2/PPT2/PDP2	4
GO:0034032	purine nucleoside bisphosphate metabolic process	4/126	138/18866	0.0138074	HACD2/PAPSS2/PPT2/PDP2	4
GO:0034033	purine nucleoside bisphosphate biosynthetic process	4/126	67/18866	0.00105044	HACD2/PAPSS2/PPT2/PDP2	4
GO:0034063	stress granule assembly	2/126	23/18866	0.0102145	DYNC1H1/G3BP2	2
GO:0034661	ncRNA catabolic process	2/126	38/18866	0.0265985	EXOSC10/TENT4B	2
GO:0035050	embryonic heart tube development	5/126	80/18866	0.000197635	AHI1/FOXC1/HIF1A/MIB1/TMED2	5
GO:0035148	tube formation	6/126	150/18866	0.000514159	GRHL2/HIF1A/MIB1/TMED2/ADM/NOG	6
GO:0035265	organ growth	5/126	191/18866	0.00919832	BNC2/FOXC1/PARP2/RARB/NOG	5
GO:0035282	segmentation	3/126	100/18866	0.0294364	FOXC1/MIB1/TMED2	3
GO:0035304	regulation of protein dephosphorylation	4/126	139/18866	0.0141449	BOD1/IGFBP3/NUAK1/PPP1R15A	4
GO:0035337	fatty-acyl-CoA metabolic process	2/126	41/18866	0.0306269	HACD2/PPT2	2
GO:0035383	thioester metabolic process	3/126	104/18866	0.0325263	HACD2/PPT2/PDP2	3
GO:0035384	thioester biosynthetic process	3/126	53/18866	0.0053424	HACD2/PPT2/PDP2	3
GO:0036499	PERK-mediated unfolded protein response	2/126	21/18866	0.00855246	PPP1R15A/CXCL8	2
GO:0042149	cellular response to glucose starvation	2/126	49/18866	0.0424402	NUAK1/NIM1K	2
GO:0042461	photoreceptor cell development	2/126	48/18866	0.0408828	AHI1/RORB	2
GO:0042594	response to starvation	4/126	206/18866	0.0494621	JUN/NUAK1/ADM/NIM1K	4
GO:0043010	camera-type eye development	7/126	332/18866	0.0069636	AHI1/FOXC1/GRHL2/HIF1A/JUN/RORB/PROM1	7
GO:0043112	receptor metabolic process	6/126	198/18866	0.002152	AHI1/FNTA/HIF1A/ADM/CXCL8/CXCR1	6
GO:0043144	snoRNA processing	2/126	15/18866	0.00438949	EXOSC10/TENT4B	2
GO:0043567	regulation of insulin-like growth factor receptor signaling pathway	2/126	26/18866	0.0129516	IGFBP3/TRIM72	2
GO:0043628	ncRNA 3'-end processing	2/126	51/18866	0.0456206	EXOSC10/TENT4B	2
GO:0043666	regulation of phosphoprotein phosphatase activity	4/126	117/18866	0.00787206	BOD1/IGFBP3/NUAK1/PPP1R15A	4
GO:0044272	sulfur compound biosynthetic process	6/126	192/18866	0.00184348	CHST2/GSTO2/HACD2/PAPSS2/PPT2/PDP2	6
GO:0044390	ubiquitin-like protein conjugating enzyme binding	2/131	39/18352	0.0315471	DCUN1D1/TRIM72	2
GO:0045123	cellular extravasation	3/126	67/18866	0.0102121	ADAM8/GOLPH3/CXCL12	3
GO:0045236	CXCR chemokine receptor binding	2/131	18/18352	0.00717886	CXCL12/CXCL8	2
GO:0045616	regulation of keratinocyte differentiation	2/126	45/18866	0.036346	FOXC1/GRHL2	2
GO:0045668	negative regulation of osteoblast differentiation	2/126	53/18866	0.048886	RORB/NOG	2
GO:0045744	negative regulation of G protein-coupled receptor signaling pathway	2/126	53/18866	0.048886	ADM/CXCL8	2
GO:0045766	positive regulation of angiogenesis	5/126	208/18866	0.0129467	HIF1A/PLK2/RLN2/ADM/CXCL8	5
GO:0045787	positive regulation of cell cycle	7/126	396/18866	0.0170905	DYNC1H1/FAM83D/MNAT1/OR2A4/PLK2/ESPL1/TGFA	7
GO:0046390	ribose phosphate biosynthetic process	5/126	194/18866	0.00979695	ATIC/HACD2/PAPSS2/PPT2/PDP2	5
GO:0046530	photoreceptor cell differentiation	3/126	63/18866	0.00862985	AHI1/RORB/PROM1	3
GO:0046620	regulation of organ growth	3/126	116/18866	0.0427676	FOXC1/PARP2/NOG	3
GO:0046885	regulation of hormone biosynthetic process	2/126	18/18866	0.00631299	HIF1A/ADM	2
GO:0046949	fatty-acyl-CoA biosynthetic process	2/126	32/18866	0.019259	HACD2/PPT2	2
GO:0048009	insulin-like growth factor receptor signaling pathway	3/126	38/18866	0.00206879	CRIM1/IGFBP3/TRIM72	3
GO:0048193	Golgi vesicle transport	6/126	374/18866	0.0396636	DNAJC28/DYNC1H1/ERGIC2/GOLPH3/TMED2/TGFA	6
GO:0048194	Golgi vesicle budding	3/126	81/18866	0.0170062	GOLPH3/TMED2/TGFA	3
GO:0048546	digestive tract morphogenesis	2/126	50/18866	0.0440196	AHI1/HIF1A	2
GO:0048562	embryonic organ morphogenesis	7/126	302/18866	0.00419725	AHI1/GRHL2/HIF1A/MIB1/RARB/TMED2/NOG	7
GO:0048565	digestive tract development	4/126	135/18866	0.012826	AHI1/HIF1A/RARB/CXCL8	4
GO:0048566	embryonic digestive tract development	2/126	34/18866	0.0215954	RARB/CXCL8	2
GO:0048568	embryonic organ development	11/126	451/18866	0.000222301	AHI1/FOXC1/GRHL2/HIF1A/MIB1/RARB/TBC1D23/TMED2/ADM/CXCL8/NOG	11
GO:0048588	developmental cell growth	6/126	237/18866	0.00519838	IFRD1/PARP2/CXCL12/PLXNA4/PTPRS/RAPH1	6
GO:0048592	eye morphogenesis	5/126	156/18866	0.00396942	AHI1/HIF1A/RARB/RORB/PROM1	5
GO:0048593	camera-type eye morphogenesis	4/126	125/18866	0.00988128	AHI1/HIF1A/RORB/PROM1	4
GO:0048638	regulation of developmental growth	7/126	353/18866	0.0095825	FOXC1/IFRD1/PARP2/CXCL12/NOG/PLXNA4/PTPRS	7
GO:0048640	negative regulation of developmental growth	3/126	115/18866	0.0418591	IFRD1/NOG/PTPRS	3
GO:0048668	collateral sprouting	2/126	27/18866	0.0139271	IFRD1/PTPRS	2
GO:0048670	regulation of collateral sprouting	2/126	20/18866	0.00777168	IFRD1/PTPRS	2
GO:0048675	axon extension	5/126	123/18866	0.00141436	IFRD1/CXCL12/PLXNA4/PTPRS/RAPH1	5
GO:0048705	skeletal system morphogenesis	5/126	228/18866	0.01854	FOXC1/GRHL2/RARB/FREM1/NOG	5
GO:0048841	regulation of axon extension involved in axon guidance	2/126	32/18866	0.019259	CXCL12/PLXNA4	2
GO:0048846	axon extension involved in axon guidance	2/126	37/18866	0.0253074	CXCL12/PLXNA4	2
GO:0048880	sensory system development	8/126	394/18866	0.0049895	AHI1/FOXC1/GRHL2/HIF1A/JUN/RARB/RORB/PROM1	8
GO:0050000	chromosome localization	3/126	79/18866	0.0159139	BOD1/DYNC1H1/FAM83D	3
GO:0050679	positive regulation of epithelial cell proliferation	5/126	211/18866	0.0137012	HIF1A/JUN/CXCL12/NOG/TGFA	5
GO:0050768	negative regulation of neurogenesis	5/126	295/18866	0.0480162	IFRD1/MIB1/PLK2/NOG/PTPRS	5
GO:0050770	regulation of axonogenesis	4/126	186/18866	0.0362074	IFRD1/CXCL12/PLXNA4/PTPRS	4
GO:0050773	regulation of dendrite development	4/126	155/18866	0.0202666	CAMK1D/PLK2/PTPRS/SS18L1	4
GO:0050901	leukocyte tethering or rolling	2/126	29/18866	0.0159704	GOLPH3/CXCL12	2
GO:0050926	regulation of positive chemotaxis	2/126	26/18866	0.0129516	CXCL12/CXCL8	2
GO:0050927	positive regulation of positive chemotaxis	2/126	25/18866	0.0120073	CXCL12/CXCL8	2
GO:0050930	induction of positive chemotaxis	2/126	14/18866	0.00382086	CXCL12/CXCL8	2
GO:0051293	establishment of spindle localization	2/126	45/18866	0.036346	DYNC1H1/ESPL1	2
GO:0051303	establishment of chromosome localization	3/126	79/18866	0.0159139	BOD1/DYNC1H1/FAM83D	3
GO:0051310	metaphase plate congression	3/126	61/18866	0.00789693	BOD1/DYNC1H1/FAM83D	3
GO:0051443	positive regulation of ubiquitin-protein transferase activity	2/126	35/18866	0.0228055	UBE2S/DCUN1D1	2
GO:0051648	vesicle localization	6/126	229/18866	0.00440603	CCDC186/DYNC1H1/TBC1D23/TMED2/SYT11/TGFA	6
GO:0051650	establishment of vesicle localization	6/126	212/18866	0.00302257	CCDC186/DYNC1H1/TBC1D23/TMED2/SYT11/TGFA	6
GO:0051653	spindle localization	2/126	50/18866	0.0440196	DYNC1H1/ESPL1	2
GO:0051656	establishment of organelle localization	10/126	432/18866	0.000648044	BOD1/CCDC186/DYNC1H1/FAM83D/HIF1A/TBC1D23/TMED2/ESPL1/SYT11/TGFA	10
GO:0051972	regulation of telomerase activity	2/126	48/18866	0.0408828	GRHL2/PIF1	2
GO:0055010	ventricular cardiac muscle tissue morphogenesis	2/126	48/18866	0.0408828	FOXC1/NOG	2
GO:0055017	cardiac muscle tissue growth	3/126	107/18866	0.0349507	FOXC1/PARP2/NOG	3
GO:0055123	digestive system development	4/126	147/18866	0.0170335	AHI1/HIF1A/RARB/CXCL8	4
GO:0060041	retina development in camera-type eye	4/126	150/18866	0.018205	AHI1/HIF1A/RORB/PROM1	4
GO:0060042	retina morphogenesis in camera-type eye	3/126	60/18866	0.00754483	AHI1/RORB/PROM1	3
GO:0060076	excitatory synapse	2/133	52/19559	0.0487957	AKAP5/SYT11	2
GO:0060219	camera-type eye photoreceptor cell differentiation	2/126	26/18866	0.0129516	RORB/PROM1	2
GO:0060249	anatomical structure homeostasis	8/126	469/18866	0.0134891	ADAM8/EXOSC10/FOXC1/HIF1A/NANOS1/PIF1/TENT4B/PROM1	8
GO:0060324	face development	2/126	48/18866	0.0408828	GRHL2/NOG	2
GO:0060348	bone development	4/126	204/18866	0.048031	FOXC1/PAPSS2/RARB/FREM1	4
GO:0060349	bone morphogenesis	3/126	94/18866	0.0251091	FOXC1/RARB/FREM1	3
GO:0060352	cell adhesion molecule production	2/126	22/18866	0.00936689	GOLPH3/CXCL8	2
GO:0060419	heart growth	3/126	115/18866	0.0418591	FOXC1/PARP2/NOG	3
GO:0060425	lung morphogenesis	2/126	52/18866	0.0472428	GRHL2/NOG	2
GO:0060485	mesenchyme development	5/126	290/18866	0.0452048	BNC2/FAM83D/FOXC1/HIF1A/NOG	5
GO:0060560	developmental growth involved in morphogenesis	5/126	236/18866	0.0211634	IFRD1/CXCL12/PLXNA4/PTPRS/RAPH1	5
GO:0060562	epithelial tube morphogenesis	7/126	331/18866	0.00685388	AHI1/GRHL2/HIF1A/MIB1/TMED2/ADM/NOG	7
GO:0060571	morphogenesis of an epithelial fold	2/126	25/18866	0.0120073	HIF1A/NOG	2
GO:0060606	tube closure	4/126	92/18866	0.00336955	GRHL2/TMED2/ADM/NOG	4
GO:0060669	embryonic placenta morphogenesis	2/126	25/18866	0.0120073	GRHL2/ADM	2
GO:0060670	branching involved in labyrinthine layer morphogenesis	2/126	12/18866	0.00279549	GRHL2/ADM	2
GO:0060711	labyrinthine layer development	3/126	49/18866	0.0042837	GRHL2/TMED2/ADM	3
GO:0060713	labyrinthine layer morphogenesis	2/126	21/18866	0.00855246	GRHL2/ADM	2
GO:0061000	negative regulation of dendritic spine development	2/126	13/18866	0.00328936	PLK2/PTPRS	2
GO:0061037	negative regulation of cartilage development	2/126	31/18866	0.0181336	RARB/NOG	2
GO:0061053	somite development	4/126	89/18866	0.00298987	FOXC1/MIB1/TMED2/NOG	4
GO:0061326	renal tubule development	3/126	95/18866	0.0258046	AHI1/NOG/PROM1	3
GO:0061371	determination of heart left/right asymmetry	4/126	69/18866	0.00117269	AHI1/HIF1A/MIB1/TMED2	4
GO:0061387	regulation of extent of cell growth	4/126	111/18866	0.00655611	IFRD1/CXCL12/PLXNA4/PTPRS	4
GO:0061614	pri-miRNA transcription by RNA polymerase II	2/126	53/18866	0.048886	HIF1A/JUN	2
GO:0061756	leukocyte adhesion to vascular endothelial cell	2/126	53/18866	0.048886	GOLPH3/CXCL12	2
GO:0070034	telomerase RNA binding	2/131	22/18352	0.0106388	EXOSC10/TENT4B	2
GO:0070098	chemokine-mediated signaling pathway	5/126	88/18866	0.000308668	FOXC1/HIF1A/CXCL12/CXCL8/CXCR1	5
GO:0070231	T cell apoptotic process	2/126	49/18866	0.0424402	ADAM8/HIF1A	2
GO:0070232	regulation of T cell apoptotic process	2/126	34/18866	0.0215954	ADAM8/HIF1A	2
GO:0070242	thymocyte apoptotic process	2/126	17/18866	0.00563606	ADAM8/HIF1A	2
GO:0070243	regulation of thymocyte apoptotic process	2/126	12/18866	0.00279549	ADAM8/HIF1A	2
GO:0070566	adenylyltransferase activity	2/131	31/18352	0.0205409	PAPSS2/TENT4B	2
GO:0071044	histone mRNA catabolic process	2/126	12/18866	0.00279549	EXOSC10/TENT4B	2
GO:0071616	acyl-CoA biosynthetic process	3/126	53/18866	0.0053424	HACD2/PPT2/PDP2	3
GO:0071622	regulation of granulocyte chemotaxis	2/126	52/18866	0.0472428	CAMK1D/CXCL8	2
GO:0071624	positive regulation of granulocyte chemotaxis	2/126	29/18866	0.0159704	CAMK1D/CXCL8	2
GO:0071706	tumor necrosis factor superfamily cytokine production	3/126	119/18866	0.045552	ADAM8/SPON2/TBC1D23	3
GO:0071887	leukocyte apoptotic process	3/126	108/18866	0.0357791	ADAM8/HIF1A/CXCL12	3
GO:0071897	DNA biosynthetic process	4/126	196/18866	0.0425411	EXOSC10/GRHL2/PIF1/TENT4B	4
GO:0072001	renal system development	5/126	292/18866	0.0463172	AHI1/FOXC1/RARB/NOG/PROM1	5
GO:0072006	nephron development	4/126	143/18866	0.0155469	AHI1/FOXC1/NOG/PROM1	4
GO:0072009	nephron epithelium development	4/126	110/18866	0.00635206	AHI1/FOXC1/NOG/PROM1	4
GO:0072010	glomerular epithelium development	2/126	23/18866	0.0102145	FOXC1/PROM1	2
GO:0072073	kidney epithelium development	5/126	142/18866	0.00265314	AHI1/FOXC1/RARB/NOG/PROM1	5
GO:0072080	nephron tubule development	3/126	93/18866	0.0244239	AHI1/NOG/PROM1	3
GO:0072132	mesenchyme morphogenesis	2/126	52/18866	0.0472428	FOXC1/NOG	2
GO:0072163	mesonephric epithelium development	3/126	99/18866	0.0286895	FOXC1/RARB/NOG	3
GO:0072164	mesonephric tubule development	3/126	99/18866	0.0286895	FOXC1/RARB/NOG	3
GO:0072175	epithelial tube formation	6/126	133/18866	0.00027034	GRHL2/HIF1A/MIB1/TMED2/ADM/NOG	6
GO:0072521	purine-containing compound metabolic process	7/126	472/18866	0.0391493	ATIC/HACD2/HIF1A/PAPSS2/PPT2/PDP2/SLC16A9	7
GO:0072522	purine-containing compound biosynthetic process	5/126	208/18866	0.0129467	ATIC/HACD2/PAPSS2/PPT2/PDP2	5
GO:0072542	protein phosphatase activator activity	2/131	13/18352	0.00374616	IGFBP3/PPP1R15A	2
GO:0072686	mitotic spindle	4/133	133/19559	0.0129721	FAM83D/OR2A4/TPPP/ESPL1	4
GO:0090022	regulation of neutrophil chemotaxis	2/126	33/18866	0.0204131	CAMK1D/CXCL8	2
GO:0090023	positive regulation of neutrophil chemotaxis	2/126	26/18866	0.0129516	CAMK1D/CXCL8	2
GO:0090042	tubulin deacetylation	2/126	13/18866	0.00328936	FNTA/TPPP	2
GO:0090043	regulation of tubulin deacetylation	2/126	10/18866	0.00192276	FNTA/TPPP	2
GO:0090068	positive regulation of cell cycle process	6/126	302/18866	0.0159456	DYNC1H1/FAM83D/OR2A4/PLK2/ESPL1/TGFA	6
GO:0090184	positive regulation of kidney development	2/126	40/18866	0.0292586	NOG/PROM1	2
GO:0090311	regulation of protein deacetylation	2/126	45/18866	0.036346	FNTA/TPPP	2
GO:0090575	RNA polymerase II transcription regulator complex	4/133	161/19559	0.0243146	HIF1A/JUN/MNAT1/MED18	4
GO:0090596	sensory organ morphogenesis	6/126	269/18866	0.00943716	AHI1/HIF1A/RARB/RORB/NOG/PROM1	6
GO:0097193	intrinsic apoptotic signaling pathway	5/126	290/18866	0.0452048	DYRK2/HIF1A/JMY/PPP1R15A/CXCL12	5
GO:0097431	mitotic spindle pole	2/133	30/19559	0.0176282	FAM83D/OR2A4	2
GO:0097529	myeloid leukocyte migration	5/126	222/18866	0.0167203	ADAM8/CAMK1D/CXCL12/CXCL8/CXCR1	5
GO:0097530	granulocyte migration	4/126	150/18866	0.018205	ADAM8/CAMK1D/CXCL8/CXCR1	4
GO:0098732	macromolecule deacylation	3/126	111/18866	0.0383248	FNTA/PPT2/TPPP	3
GO:0098813	nuclear chromosome segregation	5/126	272/18866	0.0359206	BOD1/DYNC1H1/FAM83D/ESPL1/HORMAD2	5
GO:0098868	bone growth	2/126	31/18866	0.0181336	BNC2/RARB	2
GO:0110111	negative regulation of animal organ morphogenesis	2/126	35/18866	0.0228055	FOXC1/NOG	2
GO:0140467	integrated stress response signaling	2/126	21/18866	0.00855246	PPP1R15A/CXCL8	2
GO:0150063	visual system development	8/126	388/18866	0.00455588	AHI1/FOXC1/GRHL2/HIF1A/JUN/RARB/RORB/PROM1	8
GO:1900151	regulation of nuclear-transcribed mRNA catabolic process, deadenylation-dependent decay	2/126	20/18866	0.00777168	NANOS1/TENT4B	2
GO:1901293	nucleoside phosphate biosynthetic process	5/126	269/18866	0.0344993	ATIC/HACD2/PAPSS2/PPT2/PDP2	5
GO:1901987	regulation of cell cycle phase transition	7/126	486/18866	0.0446272	DYNC1H1/FAM83D/PLK2/WEE1/ESPL1/FBXL7/TM4SF5	7
GO:1902115	regulation of organelle assembly	4/126	194/18866	0.0412273	DYNC1H1/G3BP2/PLK2/PTPRS	4
GO:1902284	neuron projection extension involved in neuron projection guidance	2/126	37/18866	0.0253074	CXCL12/PLXNA4	2
GO:1902622	regulation of neutrophil migration	3/126	42/18866	0.00276119	ADAM8/CAMK1D/CXCL8	3
GO:1902624	positive regulation of neutrophil migration	3/126	31/18866	0.00114046	ADAM8/CAMK1D/CXCL8	3
GO:1902667	regulation of axon guidance	2/126	44/18866	0.0348802	CXCL12/PLXNA4	2
GO:1902806	regulation of cell cycle G1/S phase transition	4/126	206/18866	0.0494621	FAM83D/PLK2/WEE1/TM4SF5	4
GO:1902893	regulation of pri-miRNA transcription by RNA polymerase II	2/126	51/18866	0.0456206	HIF1A/JUN	2
GO:1902895	positive regulation of pri-miRNA transcription by RNA polymerase II	2/126	40/18866	0.0292586	HIF1A/JUN	2
GO:1903555	regulation of tumor necrosis factor superfamily cytokine production	3/126	113/18866	0.040072	ADAM8/SPON2/TBC1D23	3
GO:1903557	positive regulation of tumor necrosis factor superfamily cytokine production	2/126	52/18866	0.0472428	ADAM8/SPON2	2
GO:1903708	positive regulation of hemopoiesis	5/126	204/18866	0.0119853	ADAM8/FOXC1/HIF1A/JUN/TNFSF9	5
GO:1904018	positive regulation of vasculature development	5/126	235/18866	0.020823	HIF1A/PLK2/RLN2/ADM/CXCL8	5
GO:1904356	regulation of telomere maintenance via telomere lengthening	3/126	61/18866	0.00789693	EXOSC10/PIF1/TENT4B	3
GO:1904357	negative regulation of telomere maintenance via telomere lengthening	3/126	27/18866	0.000756708	EXOSC10/PIF1/TENT4B	3
GO:1905332	positive regulation of morphogenesis of an epithelium	2/126	36/18866	0.024043	AHI1/NOG	2
GO:1990138	neuron projection extension	5/126	172/18866	0.00598238	IFRD1/CXCL12/PLXNA4/PTPRS/RAPH1	5
GO:1990266	neutrophil migration	4/126	122/18866	0.00909276	ADAM8/CAMK1D/CXCL8/CXCR1	4
GO:1990868	response to chemokine	5/126	97/18866	0.000484097	FOXC1/HIF1A/CXCL12/CXCL8/CXCR1	5
GO:1990869	cellular response to chemokine	5/126	97/18866	0.000484097	FOXC1/HIF1A/CXCL12/CXCL8/CXCR1	5
GO:2000106	regulation of leukocyte apoptotic process	3/126	86/18866	0.0199166	ADAM8/HIF1A/CXCL12	3
GO:2000107	negative regulation of leukocyte apoptotic process	2/126	49/18866	0.0424402	HIF1A/CXCL12	2
GO:2000171	negative regulation of dendrite development	2/126	28/18866	0.0149336	PLK2/PTPRS	2
GO:2000278	regulation of DNA biosynthetic process	4/126	109/18866	0.00615229	EXOSC10/GRHL2/PIF1/TENT4B	4
GO:2000279	negative regulation of DNA biosynthetic process	3/126	39/18866	0.00223034	EXOSC10/PIF1/TENT4B	3
GO:2000403	positive regulation of lymphocyte migration	2/126	38/18866	0.0265985	ADAM8/CXCL12	2
GO:2000404	regulation of T cell migration	2/126	44/18866	0.0348802	ADAM8/CXCL12	2
GO:2000406	positive regulation of T cell migration	2/126	31/18866	0.0181336	ADAM8/CXCL12	2
GO:2000772	regulation of cellular senescence	2/126	53/18866	0.048886	NUAK1/PLK2	2
GO:2000826	regulation of heart morphogenesis	2/126	41/18866	0.0306269	FOXC1/NOG	2
GO:2001251	negative regulation of chromosome organization	5/126	148/18866	0.00317077	EXOSC10/MNAT1/PIF1/TENT4B/ESPL1	5
hsa04137	Mitophagy	3/36	76/5894	0.0102859	HIF1A/JUN/RRAS2	3
hsa05120	Epithelial cell signaling in Helicobacter pylori infection	3/36	68/5894	0.00799017	JUN/CXCL8/CXCR1	3
hsa05200	Pathways in cancer	5/36	327/5894	0.0467377	HIF1A/JUN/RARB/CXCL8/TGFA	5
hsa05211	Renal cell carcinoma	3/36	70/5894	0.00865497	HIF1A/JUN/TGFA	3
hsa05223	Non-small cell lung cancer	2/36	54/5894	0.042563	RARB/TGFA	2
hsa05323	Rheumatoid arthritis	3/36	92/5894	0.0181201	JUN/CXCL12/CXCL8	3
